# Supplementary material
Source: Research Square preprint supplement (doi:10.21203/rs.3.rs-9793637/v1)
Supplement: Supplementary file 1 [file c01dba615f29ea447bfefec7.docx]

**Additional File 1**


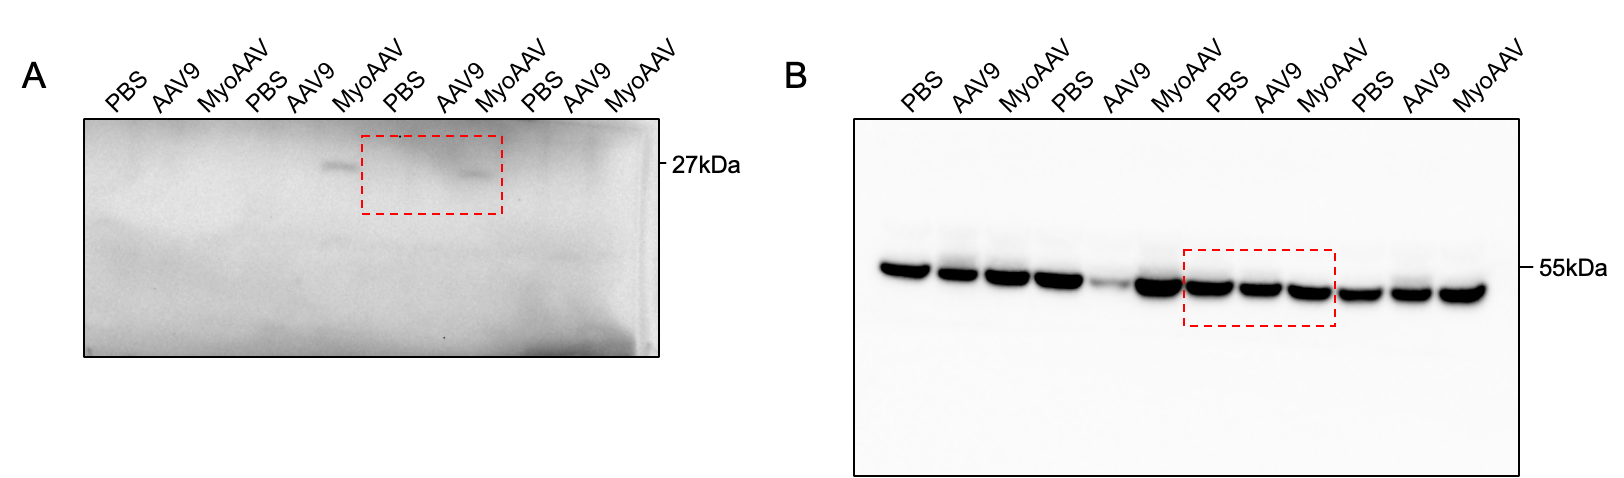


Supplementary Figure 1 – Original, unprocessed images of Western blots corresponding to Figure 1d (AAV9 vs MyoAAV GC). A) GFP B) α-Tubulin. Red box indicates image used in figure.


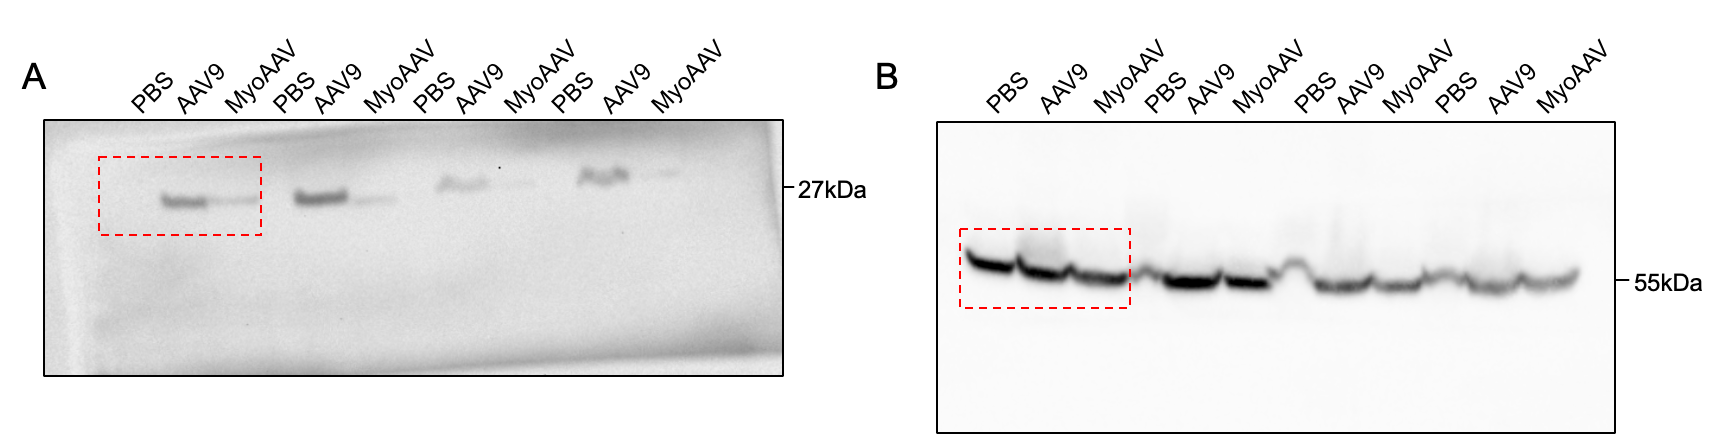


Supplementary Figure 2 – Original, unprocessed images of Western blots corresponding to Figure 1e (AAV9 vs MyoAAV Liver). A) GFP B) α-Tubulin. Red box indicates image used in figure.


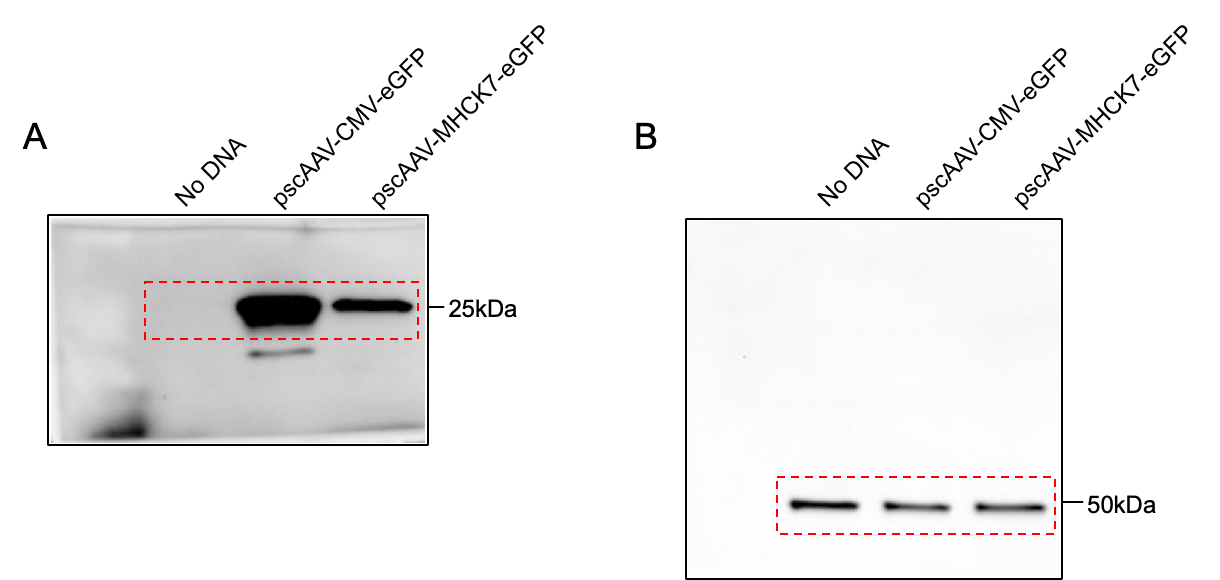


Supplementary Figure 3 – Original, unprocessed images of Western blots corresponding to Figure 2b (CMV vs MHCK7 C2C12). A) GFP B) β-Tubulin. Red box indicates image used in figure.


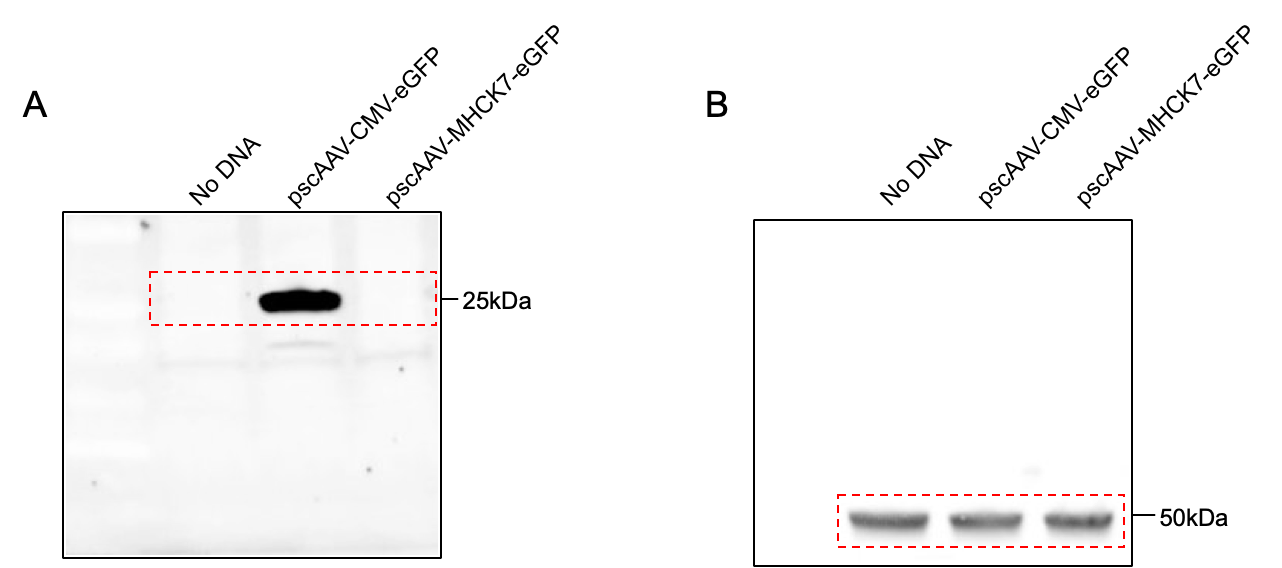


Supplementary Figure 4 – Original, unprocessed images of Western blots corresponding to Figure 2d (CMV vs MHCK7 N2A). A) GFP B) β-Tubulin. Red box indicates image used in figure.


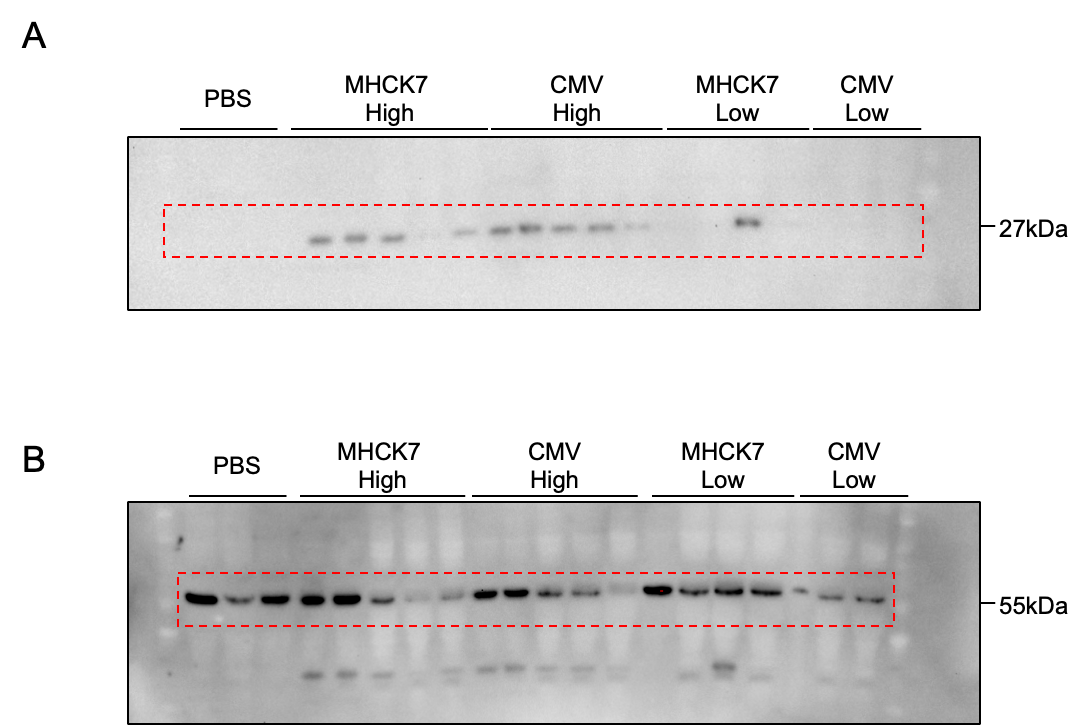


Supplementary Figure 5 – Original, unprocessed images of Western blots corresponding to Figure 3i (CMV vs MHCK7 TA). A) GFP B) α-Tubulin. Red box indicates image used in figure.


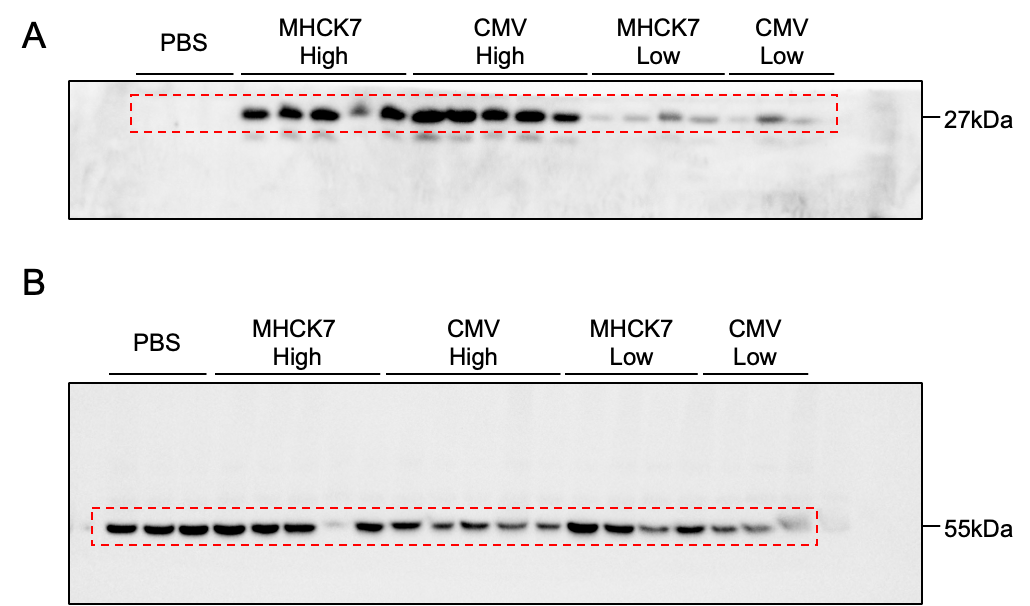


Supplementary Figure 6 – Original, unprocessed images of Western blots corresponding to Figure 3j (CMV vs MHCK7 GC). A) GFP B) α-Tubulin. Red box indicates image used in figure.


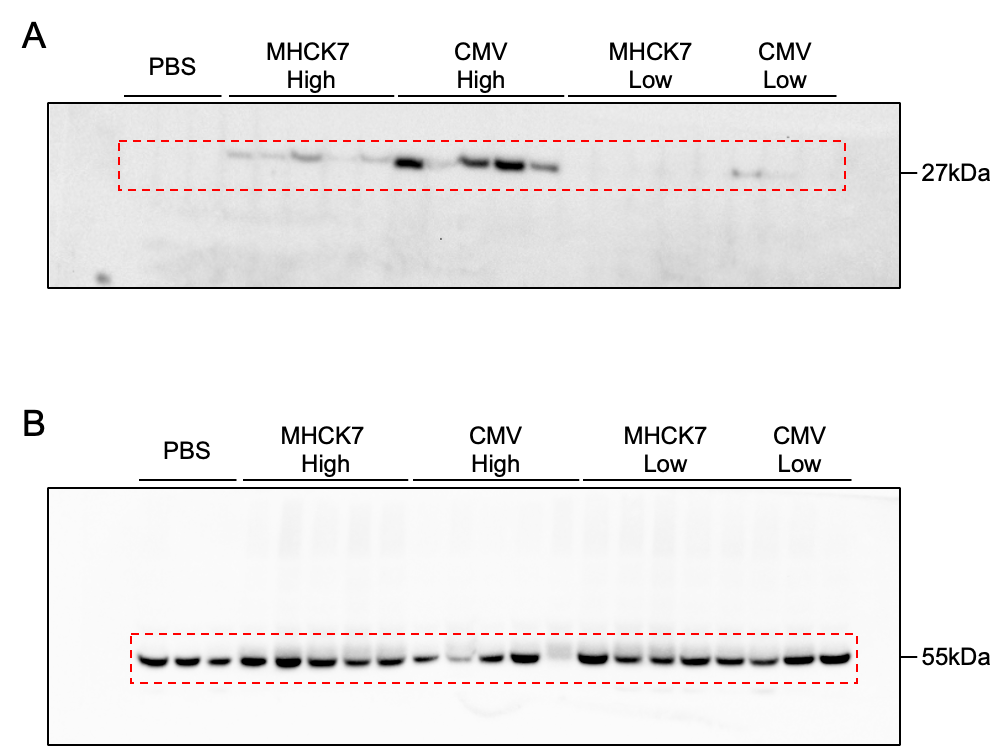


Supplementary Figure 7 – Original, unprocessed images of Western blots corresponding to Figure 3k (CMV vs MHCK7 Liver). A) GFP B) α-Tubulin. Red box indicates image used in figure.


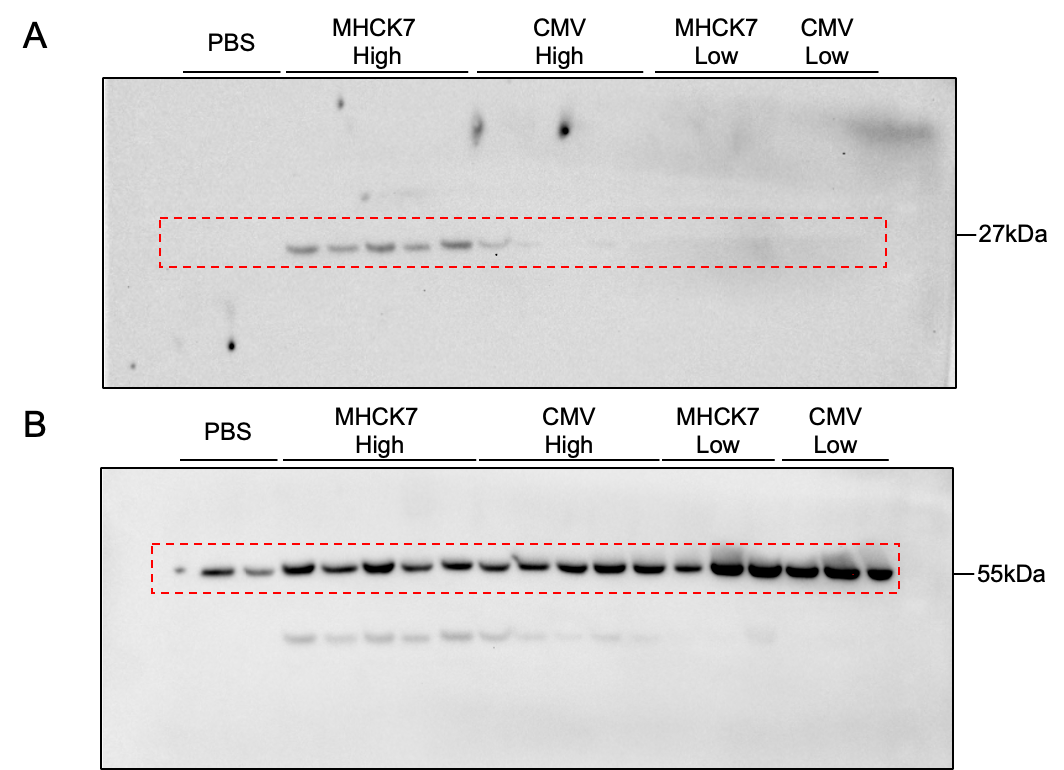


Supplementary Figure 8 – Original, unprocessed images of Western blots corresponding to Figure 3l (CMV vs MHCK7 Heart). A) GFP B) α-Tubulin. Red box indicates image used in figure.
